# Supplementary material for: Geographic and Ecological Diversity of Green Sulfur Bacteria in Hot Spring Mat Communities
Source: Microorganisms. 2023 Dec 4;11(12):2921. doi: 10.3390/microorganisms11122921 (PMC10746008; doi:10.3390/microorganisms11122921)
Supplement: Supplementary file 1 [file microorganisms-11-02921-s001.zip › microorganisms-2716425-supplementary.pdf]

## **Supplementary Information for**

# **GEOGRAPHIC AND ECOLOGICAL DIVERSITY OF GREEN SULFUR BACTERIA IN HOT SPRING MAT COMMUNITIES**

Donna L. Bedard<sup>1</sup>, Greta Van Slyke<sup>1</sup>, Ulrich Nübel<sup>2,3</sup>, Mary M. Bateson<sup>2</sup>, Susan Brumfield<sup>4</sup>, Yong Jun An<sup>1</sup>, Eric D. Becraft<sup>2,5</sup>, Jason M. Wood<sup>2,6</sup>, Vera Thiel<sup>3</sup>, and David M. Ward<sup>2</sup> \*

Sample collection and Processing

Media Preparation

Supplementary Table 1. Hot springs in which GSB were not found.

Supplementary Table 2. Diversity of bacteria found in the GSB Mat at site Lipayo-5.

## **Sample Collection and Processing**

### **Yellowstone National Park:**

Sampling in YNP was limited to summer for a variety of reasons including accessibility and weather. For this study we collected samples in YNP during the summers of 2000, 2001, and 2002 as described in Table 1 and Supplementary Table 1. Typically, we aseptically collected the samples and transferred them to microvials then onto ice for transport. Samples were stored at 4 °C and aliquots for later DNA analysis were stored at -20 °C, or long term at -80 °C. Samples were always tested by PCR with GSB-specific primers, (Table 2) within a few days of collection. Growth was only attempted with samples that tested positive with GSB-specific primers.

Big Spring samples from Gibbon Geysers Basin were collected twice in 2000, and once in 2001 on August 8. Sites BS1, BS2, and BS3 were sampled on June 21, 2000, and site BS3, an unusual floating mat, was sampled again on June 29; these samples were then designated BS3.1 and 3.2. The following year the mats at sites BS2 and BS3 were no longer there. Site BS1 was sampled again on August 6 and designated BS1-01.

MV samples from *Mud Volcano* were collected once each year from 2000 to 2002. As stated in the main text, these springs were ephemeral and did not persist from year to year. On June 29, 2000, small bubbling springs that were good candidates for GSB were discovered and sampled. We collected samples MV1 and MV2. It was already late in the day when we found them because we had already sampled at Big Spring and we were unable to explore further because it was getting dark. We visited this site again on August 7, 2001. We found and sampled MV3.

Sites MV1 and MV2 were no longer discrete springs. Now the site where they had been the previous year was a large mat spreading across the entire pool where they were located (Figure 3F); we collected samples MV4 and MV5. We visited the area for the last time on July 31, 2002, and collected sample MV6.

*Mammoth Terraces* was the easiest sampling site for us to visit and we visited it all three years. In all, we sampled the 8 sites listed in Supplementary Table 1 plus Narrow Gauge 2 and Angel Terrace listed in Table 1. Only the last two springs tested positive with GSB-specific primers, but enrichments from these samples did not grow. Angel Terrace was difficult to access and dangerous to sample, so we sampled there only once.

**New Zealand:** Mat samples were collected from Travel Lodge Spring in 1986 when DMW was there with other colleagues. When we discovered GSB in YNP hot springs in 2000 it seemed appropriate to revive these samples and to sequence the mat DNA which had never been sequenced before.

**Lipayo 5, The Philippines:** DLB had the opportunity to visit the Philippines in January of 2002 and took the opportunity to look for hot springs that might harbor GSB. Multiple sites were visited, but Lipayo 5 was the only site that showed evidence of possible GSB mats.

**Sample processing:** Samples were examined microscopically within a day or so after collection. Whenever samples tested positive by PCR we attempted to grow them as soon as possible. Only two water baths were readily available for these studies so our ability to test different temperatures was limited. Absorption spectra were done as soon as enriched cells were available. DNA extraction, cloning, and sequencing were done only after PCR results indicated the presence of GSB and as time allowed.

## Media Preparation

The **Maintenance Medium** ([20] in main text) that we used for all cultures, including cultures revived from frozen stocks, was a modified version of Pfennig's Medium 29. In most cases we included thiosulfate which gave better growth. In enrichments derived from samples BS3.1 and BS3.2, thiosulfate encouraged the growth of purple sulfur bacteria that were also present in the mat, so we eliminated the thiosulfate for those enrichments.

For 250 ml combine in the order given:

Reduced, sterile ultrapure H<sub>2</sub>O, 63.5 ml  
1.5x Basal Salts Medium, 166.5ml  
1M NaHCO<sub>3</sub>, (42x) 5.95 ml  
1.5 M MOPS (100x), 2.5 ml  
100 mM Na<sub>2</sub>S (40x), 6.25 ml  
50 g/L Na<sub>2</sub>S<sub>2</sub>O<sub>3</sub> (50x), 5.0 ml (sodium thiosulfate, optional)  
1000x SL10 (trace elements), 0.25 ml  
5000x Vitamin B<sub>12</sub> (100 µg/ml, stored frozen), 50 µl

To adjust pH we used a bromothymol blue indicator. On a small piece of parafilm, add one drop of the reagent and one drop of a buffer standard (from a set of standards made up at pH 6.7, 6.8, 6.9, and 7.0). Then add a drop of the medium to a drop of the reagent. Adjust medium by dropwise addition of sterile 2N NaOH or sterile 2N HCl until it matches the buffer standard at pH 6.9. When the medium reaches the correct pH, immediately dispense aseptically and under N<sub>2</sub> into sterile 17 ml screw top bottles filling each completely to the top.

**1.5x Basal Salts Medium** contains per liter deionized water:

EDTA, (free acid), 15 mg

MgSO<sub>4</sub> · 7 H<sub>2</sub>O, 0.3 g

CaCl<sub>2</sub> · 2 H<sub>2</sub>O, 75 mg

NaCl, 0.6 g

KH<sub>2</sub>PO<sub>4</sub>, 0.75 g

NH<sub>4</sub>Cl, 0.6g

Ammonium acetate, 0.75 g (Omit to prepare photoautotrophic medium)

**50X Sodium Thiosulfate:**

Dissolve 10 g Na<sub>2</sub>S<sub>2</sub>O<sub>3</sub> · 5 H<sub>2</sub>O in 200ml O<sub>2</sub>-free ultrapure water and filter sterilize into an autoclaved bottle. Flush the bottle with sterile N<sub>2</sub> gas.

**1 M Na HCO<sub>3</sub>:**

Dissolve 84.01 g in 1 L of boiled water that has been bubbled with CO<sub>2</sub>. Gas the headspace with CO<sub>2</sub>, seal tightly, and autoclave.

**Na<sub>2</sub>S · 9H<sub>2</sub>O:**

Sodium sulfide gets oxidized in the bottle. Therefore, remove several crystals (about twice as much as needed) and wash with ultrapure water in a funnel lined with a paper filter. Dry the crystals in a hood and weigh out. Make up in O<sub>2</sub>-free reduced ultrapure H<sub>2</sub>O in a large serum bottle at 2.4018 g/100 ml. Seal with butyl rubber stopper and autoclave.

si

**Trace elements Solution SL-10:**

See [https://www.dsmz.de/microorganisms/medium/pdf/DSMZ\\_Medium461.pdf](https://www.dsmz.de/microorganisms/medium/pdf/DSMZ_Medium461.pdf)

**Bromothymol blue pH indicator:**

Dissolve 20 mg of bromothymol blue in 3 ml of 0.01 NaOH. Add to 47 ml deionized distilled water.

**Supplementary Table S1.** Hot Springs where no Green Sulfur Bacteria were detected.

| Mammoth Terraces<br>Hot Spring Site | Date of<br>Sample | Mat Description                                                                    | Temp °C | pH  | Sulfide<br>Conc (µM) | GSB PCR product |                |      | GSB<br>Enrichment |
|-------------------------------------|-------------------|------------------------------------------------------------------------------------|---------|-----|----------------------|-----------------|----------------|------|-------------------|
|                                     |                   |                                                                                    |         |     |                      | 600F            | Nested<br>600F | 619F |                   |
| Narrow Gauge 1                      | 6/14/00           | Dark olive green & orange<br>fibrous mat growing<br>upstream of white<br>streamers | 62.0    | 6.4 | NT                   | No              | NT             | No   | NT                |
|                                     | 8/11/01           |                                                                                    | 54.8    | 6.1 | 30.4                 | No              | No             | No   | Negative          |
|                                     | 8/01/02           |                                                                                    | 54.8    | 6.8 | 14.9                 | NT              | NT             | NT   |                   |
| Painted Pool 1                      | 6/14/00           | Dark green fibrous mat                                                             | 57.5    | 6.2 | 10.2 <sup>1</sup>    | No              | NT             | No   | NT                |
| Painted Pool 2                      | 6/14/00           | Green & orange slimy mat<br>upstream of white<br>streamers                         | 58.2    | 6.3 | 24.1 <sup>1</sup>    | No              | NT             | No   | NT                |
| Cathy's Annex                       | 6/14/00           | Olive green& orange mat<br>near white streamers                                    | 60.1    | 6.3 | 41.8 <sup>1</sup>    | No              | NT             | No   | NT                |
| Green Streamer                      | 6/22/00           | Green streamers                                                                    | 59.2    | 6.3 | NT                   | No              | No             | No   | Negative          |
| New Mound                           | 6/22/00           | Olive green& orange mat<br>upstream of white<br>streamers                          | 59.4    | 6.4 | NT                   | No              | NT             | NT   | Negative          |
|                                     | 8/11/01           |                                                                                    | 60.1    | 6.3 |                      | No              | No             | No   | Negative          |
|                                     | 8/01/02           |                                                                                    | 56.6    | 6.5 |                      | NT              | NT             | NT   |                   |
| Painted Pool 3                      | 6/22/00           | Light pink & green fleshy<br>mat on sides of vent above<br>creamy white streamers  | 53.7    | 6.2 | NT                   | No              | No             | NT   | Negative          |
|                                     | 8/11/01           |                                                                                    | 56.1    | 6.1 | 25.4                 | No              | No             | No   |                   |
| Painted Pool 4                      | 6/22/00           | Deep green fleshy mat<br>collected under water on<br>sides of a 25 cm deep vent    | 58.7    | 6.3 | 25.7 <sup>1</sup>    | No              | No             | NT   | Negative          |
|                                     | 8/11/01           |                                                                                    | 60.1    | 6.2 | 7.9                  | No              | No             | No   |                   |

<sup>1</sup> Sulfide concentration for this sample was from a sample collected on 8/01/02 at a similar temperature and pH.

**Supplementary Table S2.** Diversity of eubacteria found in the green sulfur bacterial mat at site Lipayo 5.

| # of Clones in this Classification | Clone Name                              | Sequence Length (bp)                   | Accession Number                                                     | RFLP Group                    | # of Clones in RFLP Group    | Classification                     | % Identity                             | Phenotype                                                                                 | Further Classification                                                                                  |
|------------------------------------|-----------------------------------------|----------------------------------------|----------------------------------------------------------------------|-------------------------------|------------------------------|------------------------------------|----------------------------------------|-------------------------------------------------------------------------------------------|---------------------------------------------------------------------------------------------------------|
| 31                                 | 6A4<br>6B7<br>6G8<br>6N3<br>6F6<br>6B15 | 513<br>624<br>451<br>748<br>731<br>770 | OQ913398<br>OQ913399<br>OQ913400<br>OQ913401<br>OQ913402<br>OQ913403 | 1<br>3<br>8<br>11<br>18<br>24 | 3<br>10<br>13<br>2<br>2<br>1 | <i>Cyanobacteria</i>               | 100<br>100<br>100<br>100<br>100<br>100 | Cyanobacteria<br>Oxygenic Photosynthesis                                                  | Could not be reliably classified beyond the Phylum Cyanobacteria because the classification is in flux. |
| 17                                 | 6E3<br>6J3                              | 1383<br>1382                           | OQ519263<br>OQ519264                                                 | 12<br>5                       | 9<br>8                       | <i>Chlorobaculum</i> sp.           | 98.5<br>98.6                           | Green sulfur bacteria<br>Anoxygenic phototroph                                            | <i>Chlorobiales</i><br><i>Chlorobiaceae</i>                                                             |
| 5                                  | 6G7                                     | 508                                    | OQ913404                                                             | 4                             | 5                            | <i>Thiomonas</i> sp.               | 99.4                                   | Sulfur/thiosulfate/sulfide oxidizer<br>Moderate acidophile                                | <i>Burkholderiales</i><br><i>Comamonadaceae</i>                                                         |
| 3                                  | 6K3                                     | 813                                    | OQ913405                                                             | 17                            | 3                            | <i>Hydrogenobaculum</i> sp.        | 100                                    | Hydrogen-oxidizer<br>Thermoacidophilic<br>Thermolithotrophic<br>Requires elemental sulfur | Deeply branching<br><i>Aquificales</i><br><i>Aquificaceae</i>                                           |
| 3                                  | 6K7<br>6B1                              | 801<br>802                             | OQ913406<br>OQ913407                                                 | 7<br>7                        | 2<br>1                       | <i>Metallibacterium scheffleri</i> | 99.6<br>99.8                           | Acidophile<br>Found in Acid mine drainage<br>biofilm                                      | <i>Lysobacterales</i><br><i>Lysobacteraceae</i>                                                         |
| 3                                  | 6P10<br>6B11                            | 685<br>729                             | OQ913408<br>OQ913409                                                 | 14<br>22                      | 2<br>1                       | <i>Geothrix</i> sp.                | 98.4<br>97.9                           | Fe III reducer<br>Acidobacteria.                                                          | <i>Holophagales</i><br><i>Holophagaceae</i>                                                             |
| 1                                  | 6K5                                     | 737                                    | OQ913410                                                             | 48                            | 1                            | <i>Desulfomonile</i> sp.           | 96.7                                   | Sulfate/sulfur reducer                                                                    | <i>Syntrophobacterales</i><br><i>Syntrophaceae</i>                                                      |

**Supplementary Table S2.** Diversity of eubacteria found in the green sulfur bacterial mat at site Lipayo 5.

| # of Clones<br>in this<br>Classification | Clone<br>Name | Sequence<br>Length<br>(bp) | Accession<br>Number  | RFLP<br>Group | # of Clones<br>in RFLP<br>Group | Classification                            | %<br>Identity | Phenotype                                                             | Further Classification                                                   |
|------------------------------------------|---------------|----------------------------|----------------------|---------------|---------------------------------|-------------------------------------------|---------------|-----------------------------------------------------------------------|--------------------------------------------------------------------------|
| 1                                        | 6R4           | 747                        | OQ913411             | 58            | 1                               | <i>Massilia</i> sp.                       | 98.0          | Anaerobe<br>Root colonizing bacteria<br>Found in diverse environments | <i>Burkholderiales</i><br><i>Oxalobacteraceae</i>                        |
| 3                                        | 6B2<br>6E8    | 728<br>733                 | OQ913412<br>OQ913413 | 2<br>32       | 2<br>1                          | Unclassified<br><i>Campylobacteriales</i> | 95.0<br>97.0  | Microaerophilic                                                       | <i>Epsilonproteobacteria</i><br><i>Campylobacteriales</i>                |
| 1                                        | 6B12          | 756                        | OQ913414             | 23            | 1                               | Unclassified<br><i>Ignavibacteriales</i>  | 92.4          | Obligate anaerobe<br>Moderately thermophilic<br>Heterotroph           | <i>Chlorobiota</i><br><i>Ignavibacteria</i><br>Closely related to<br>GSB |
| 2                                        | 6A13          | 493                        | OQ913415             | 19            | 2                               | Unclassified<br><i>Chitinophagaceae</i>   | 97.7          | Facultative anaerobe                                                  | <i>Chitinophagia</i><br><i>Chitinophagales</i>                           |
| 1                                        | 6J5           | 656                        | OQ913416             | 45            | 1                               | <i>Terrimicrobium</i> sp.                 | 100           | Anaerobe, nonmotile                                                   | <i>Terrimicrobiales</i><br><i>Terrimicrobiaceae</i>                      |
